# Supplementary material for: Mimicking exposures to acute and lifetime concentrations of inhaled silver nanoparticles by two different in vitro approaches
Source: publisher site journal article supplement (doi:10.3762/bjnano.5.149), 2014-08-26
Supplement: Additional file 1 [file 2190-4286-5-149-S1.pdf]

## Supporting Information

for

### **Mimicking exposures to acute and lifetime concentrations of inhaled silver nanoparticles by two different in vitro approaches**

Fabian Herzog<sup>1</sup>, Kateryna Loza<sup>2</sup>, Sandor Balog<sup>1</sup>, Martin J. D. Clift<sup>1</sup>, Matthias Epple<sup>2</sup>, Peter Gehr<sup>3</sup>, Alke Petri-Fink<sup>1,4</sup> and Barbara Rothen-Rutishauser\*<sup>1,5</sup>

Address: <sup>1</sup>Adolphe Merkle Institute, BioNanomaterials, University of Fribourg, Rte de l'Ancienne Papeterie, CP 209, 1723 Marly, Switzerland, <sup>2</sup>Inorganic Chemistry and Center for Nanointegration Duisburg-Essen (CeNIDE), University of Duisburg-Essen, Universitaetsstrasse 5-7, 45141 Essen, Germany, <sup>3</sup>Institute of Anatomy, University of Bern, Baltzerstrasse 2, 3012 Bern, Switzerland, <sup>4</sup>Department of Chemistry, University of Fribourg, Chemin du Musée 9, 1700 Fribourg, Switzerland and <sup>5</sup>Respiratory Medicine, Department of Clinical Research, Inselspital University Hospital, University of Bern, Murtenstrasse 50, 3008 Bern, Switzerland

Email: Fabian Herzog - [fabian.herzog@unifr.ch](mailto:fabian.herzog@unifr.ch); Kateryna Loza - [kateryna.loza@uni-due.de](mailto:kateryna.loza@uni-due.de); Sandor Balog - [sandor.balog@unifr.ch](mailto:sandor.balog@unifr.ch); Martin J. D. Clift - [martin.clift@unifr.ch](mailto:martin.clift@unifr.ch); Matthias Epple - [matthias.epple@uni-due.de](mailto:matthias.epple@uni-due.de); Peter Gehr - [peter.gehr@ana.unibe.ch](mailto:peter.gehr@ana.unibe.ch); Alke Petri-Fink - [alke.fink@unifr.ch](mailto:alke.fink@unifr.ch); Barbara Rothen-Rutishauser\* - [barbara.rothen@unifr.ch](mailto:barbara.rothen@unifr.ch)

\* Corresponding author

### **Statistical information**

## LDH statistical information

### Air-liquid

|                 | 4h       |           |   | 24h      |            |   |
|-----------------|----------|-----------|---|----------|------------|---|
|                 | Mean     | SEM       | N | Mean     | SEM        | N |
| 0 LPS           | 1.183208 | 0.2300672 | 7 | 1.12395  | 0.1868752  | 7 |
| 0 Triton        | 12.03719 | 2.384554  | 7 | 6.369139 | 2.858138   | 6 |
| 0.03            | 1.59628  | 0.2099543 | 7 | 1.174683 | 0.1299934  | 7 |
| 0.03 LPS        | 1.209883 | 0.2159392 | 7 | 1.005751 | 0.07397007 | 7 |
| 0.3             | 2.029889 | 0.544067  | 7 | 1.187982 | 0.1149638  | 7 |
| 0.3 LPS         | 1.508786 | 0.3255128 | 7 | 1.133313 | 0.1525453  | 7 |
| 3               | 1.514661 | 0.2611198 | 4 | 2.701968 | 1.281242   | 4 |
| 3 LPS           | 2.23911  | 1.152152  | 4 | 1.598825 | 0.3680741  | 4 |
| 0 TNF- $\alpha$ | 1.056038 | 0.2848305 | 6 | 1.295242 | 0.2425573  | 6 |

### Submerged apical

|                 | 4h        |           |   | 24h       |            |   |
|-----------------|-----------|-----------|---|-----------|------------|---|
|                 | Mean      | SEM       | N | Mean      | SEM        | N |
| 0 LPS           | 0.9376091 | 0.1551273 | 4 | 0.9633195 | 0.1190512  | 4 |
| 0 Triton        | 8.961942  | 1.672538  | 4 | 7.621901  | 2.472347   | 4 |
| 10              | 1.229932  | 0.2359734 | 4 | 1.650983  | 0.07809889 | 4 |
| 10 LPS          | 1.248155  | 0.1622663 | 4 | 1.547896  | 0.1388992  | 4 |
| 20              | 1.127318  | 0.2636101 | 4 | 2.015599  | 0.5261061  | 4 |
| 20 LPS          | 0.9905616 | 0.2143921 | 4 | 2.163305  | 0.6185693  | 4 |
| 30              | 0.9446509 | 0.1087741 | 4 | 1.903531  | 0.304055   | 4 |
| 30 LPS          | 0.9715688 | 0.1600173 | 4 | 1.911844  | 0.5342641  | 4 |
| 0 TNF- $\alpha$ | 0.9539278 | 0.2191581 | 4 | 1.465547  | 0.2630565  | 4 |

### Submerged basal

|                 | 4h        |            |   | 24h       |            |   |
|-----------------|-----------|------------|---|-----------|------------|---|
|                 | Mean      | SEM        | N | Mean      | SEM        | N |
| 0 LPS           | 0.9748341 | 0.02070217 | 4 | 0.8898862 | 0.05228264 | 4 |
| 0 Triton        | 8.973631  | 1.719703   | 4 | 6.850787  | 1.394784   | 4 |
| 10              | 1.024721  | 0.2008674  | 4 | 1.080621  | 0.1215216  | 4 |
| 10 LPS          | 1.078626  | 0.1722315  | 4 | 1.300669  | 0.2915927  | 4 |
| 20              | 1.172452  | 0.09105235 | 4 | 1.318276  | 0.2725257  | 4 |
| 20 LPS          | 1.0343    | 0.08879732 | 4 | 1.232829  | 0.3723384  | 4 |
| 30              | 1.037678  | 0.14869    | 4 | 1.59003   | 0.1183439  | 4 |
| 30 LPS          | 1.119406  | 0.1143621  | 4 | 1.391683  | 0.349377   | 4 |
| 0 TNF- $\alpha$ | 0.9271843 | 0.08901137 | 4 | 1.218904  | 0.1991518  | 4 |

**Figure S1:** LDH numerical values (Figure 4).

## Air-liquid

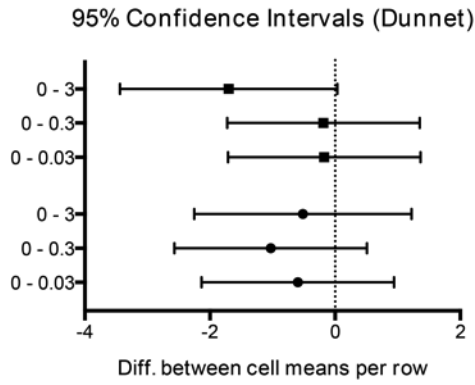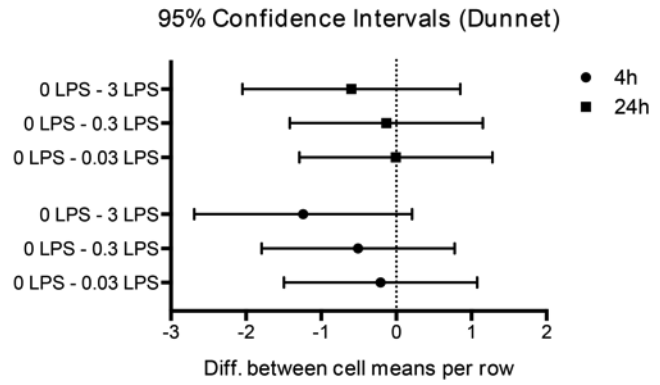

## Submerged apical

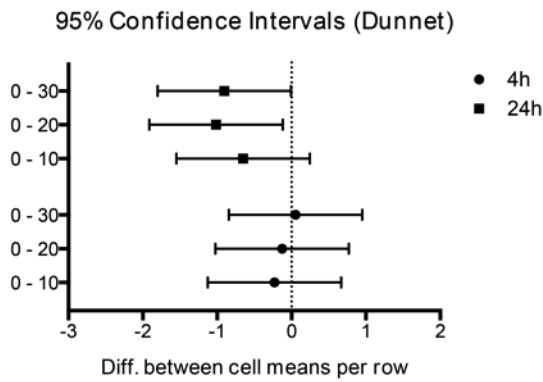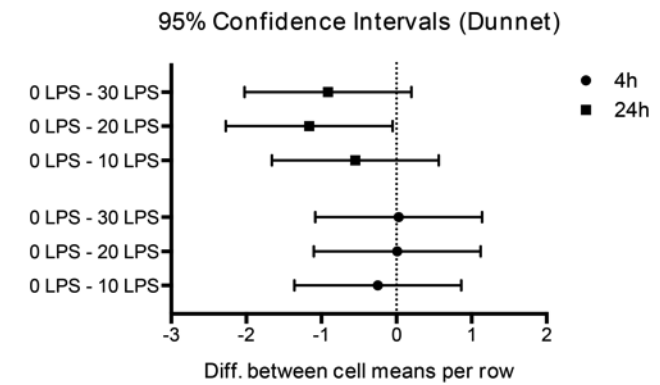

## Submerged basal

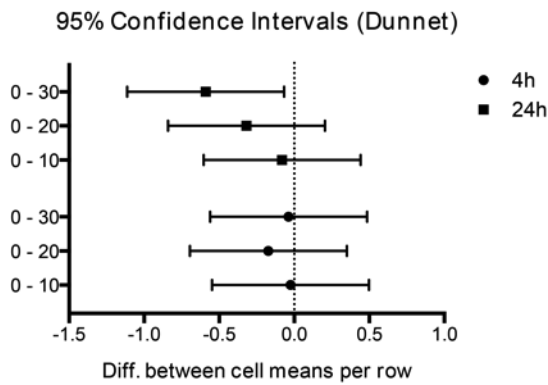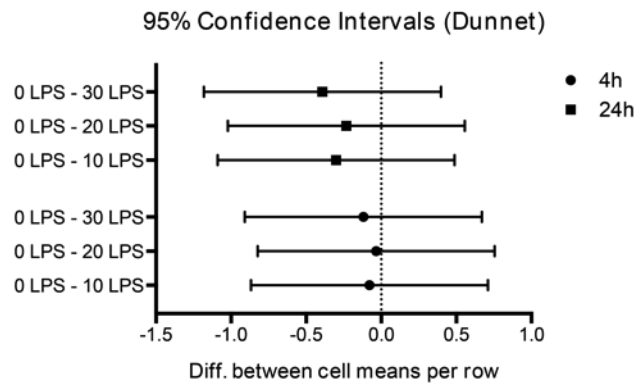

**Figure S2:** LDH confidence intervals (Figure 4).

## ELISA statistical information

### Air-liquid

|          | 4h          |             |   | 24h         |             |   |
|----------|-------------|-------------|---|-------------|-------------|---|
|          | Mean        | SEM         | N | Mean        | SEM         | N |
| 0        | 0.002396949 | 0.001191583 | 7 | 0.005954469 | 0.002047371 | 7 |
| 0.03     | 0.002757143 | 0.001690993 | 7 | 0.008109765 | 0.002820223 | 7 |
| 0.3      | 0.004042857 | 0.002433678 | 7 | 0.006398785 | 0.00211618  | 7 |
| 3        | 0.007444272 | 0.001597416 | 4 | 0.022649    | 0.01795702  | 4 |
| 0 LPS    | 1.14761     | 0.2682931   | 7 | 0.5867763   | 0.174216    | 7 |
| 0.03 LPS | 0.8200057   | 0.1628574   | 7 | 0.3790922   | 0.06138428  | 7 |
| 0.3 LPS  | 0.7556536   | 0.157138    | 7 | 0.4310234   | 0.1015208   | 7 |
| 3 LPS    | 0.8707404   | 0.1893692   | 4 | 0.4428761   | 0.1835357   | 4 |

### Submerged apical

|        | 4h        |             |   | 24h       |             |   |
|--------|-----------|-------------|---|-----------|-------------|---|
|        | Mean      | SEM         | N | Mean      | SEM         | N |
| 0      | 0.0072625 | 0.002152845 | 4 | 0.006275  | 0.003306341 | 4 |
| 10     | 0.10435   | 0.09592507  | 4 | 0.0197525 | 0.01178621  | 4 |
| 20     | 0.1176575 | 0.09962424  | 4 | 0.06679   | 0.04416129  | 4 |
| 30     | 0.0610725 | 0.02907832  | 4 | 0.0129425 | 0.00294584  | 4 |
| 0 LPS  | 0.8929375 | 0.1519856   | 4 | 0.684915  | 0.2521508   | 4 |
| 10 LPS | 0.88796   | 0.181741    | 4 | 0.785885  | 0.2761415   | 4 |
| 20 LPS | 0.829955  | 0.2192534   | 4 | 0.737545  | 0.2638289   | 4 |
| 30 LPS | 1.035245  | 0.205232    | 4 | 0.6993925 | 0.2216794   | 4 |

### Submerged basal

|        | 4h          |             |   | 24h         |             |   |
|--------|-------------|-------------|---|-------------|-------------|---|
|        | Mean        | SEM         | N | Mean        | SEM         | N |
| 0      | 0.008933083 | 0.004664426 | 4 | 0.005943096 | 0.002366219 | 4 |
| 10     | 0.02038375  | 0.01147082  | 4 | 0.01993881  | 0.01255014  | 4 |
| 20     | 0.1335115   | 0.1210377   | 4 | 0.1062834   | 0.08153138  | 4 |
| 30     | 0.3865929   | 0.3769997   | 4 | 0.03284117  | 0.01210865  | 4 |
| 0 LPS  | 1.608674    | 0.5312613   | 4 | 1.647491    | 0.6474342   | 4 |
| 10 LPS | 0.9355566   | 0.4701209   | 4 | 1.838979    | 0.558663    | 4 |
| 20 LPS | 1.405756    | 0.5893943   | 4 | 1.629033    | 0.6058467   | 4 |
| 30 LPS | 1.804887    | 0.5562839   | 4 | 1.551325    | 0.4807593   | 4 |

**Figure S3:** TNF- $\alpha$  ELISA numerical values (Figure 5).

## Air-liquid

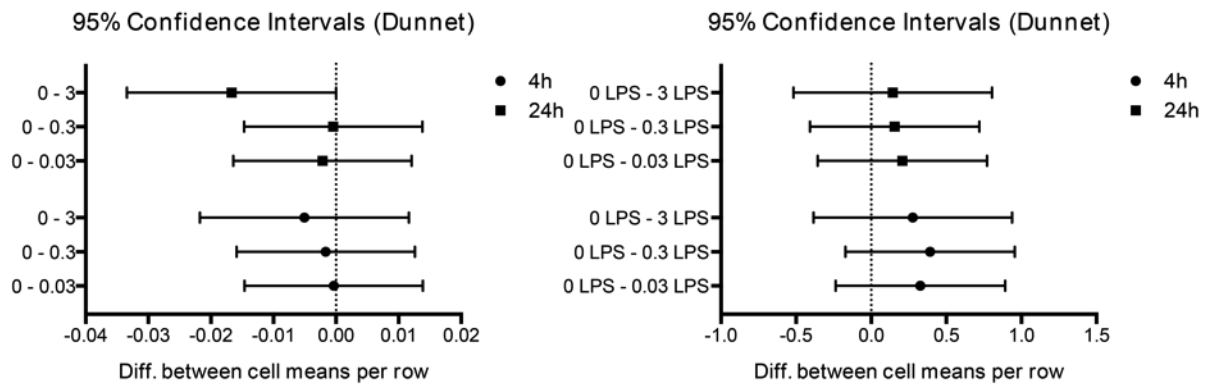

## Submerged apical

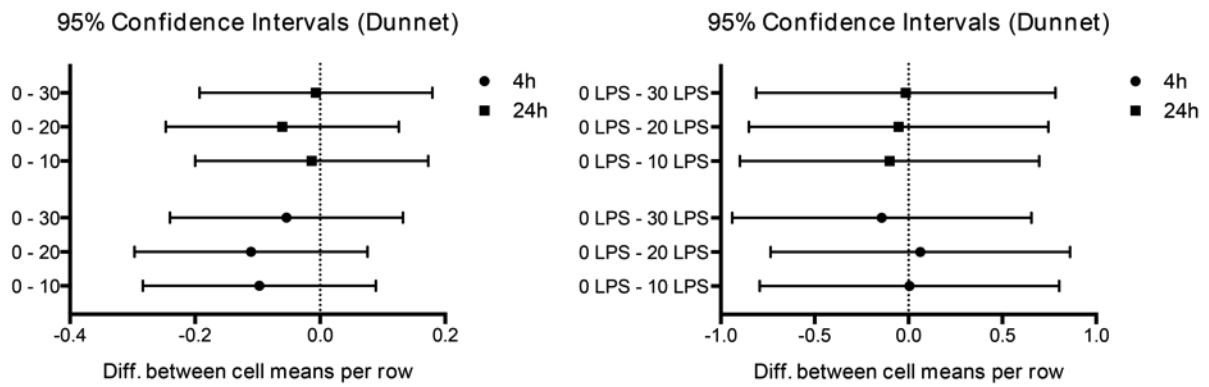

## Submerged basal

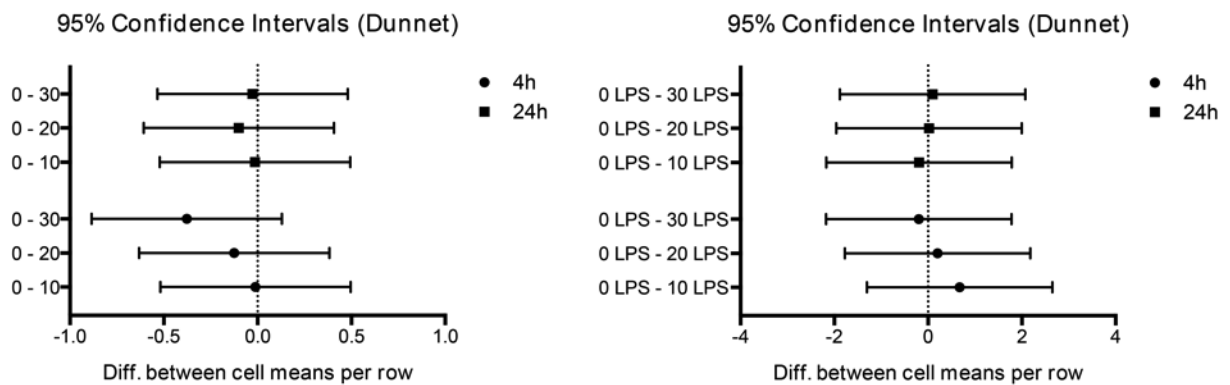

**Figure S4:** TNF- $\alpha$  ELISA confidence intervals (Figure 5).

### Air-liquid

|                 | 4h       |           |   | 24h      |          |   |
|-----------------|----------|-----------|---|----------|----------|---|
|                 | Mean     | SEM       | N | Mean     | SEM      | N |
| 0               | 1.549731 | 0.5286818 | 6 | 11.22107 | 2.914826 | 6 |
| 0.03            | 2.546267 | 0.6463377 | 6 | 12.55854 | 2.399343 | 6 |
| 0.3             | 3.827393 | 0.6624322 | 6 | 16.28226 | 3.149896 | 6 |
| 3               | 5.015773 | 1.136081  | 4 | 18.29991 | 3.408101 | 4 |
| 0 LPS           | 24.4936  | 4.087953  | 6 | 40.2624  | 5.239343 | 6 |
| 0.03 LPS        | 26.2643  | 4.590001  | 6 | 40.52784 | 5.325487 | 6 |
| 0.3 LPS         | 30.02083 | 5.657012  | 6 | 40.26498 | 5.714561 | 6 |
| 3 LPS           | 23.87286 | 5.861775  | 4 | 35.20732 | 7.170444 | 4 |
| 0 TNF- $\alpha$ | 19.22579 | 4.693774  | 5 | 35.56175 | 6.415161 | 5 |

### Submerged apical

|                 | 4h       |           |   | 24h      |          |   |
|-----------------|----------|-----------|---|----------|----------|---|
|                 | Mean     | SEM       | N | Mean     | SEM      | N |
| 0               | 1.359866 | 0.510445  | 4 | 5.538367 | 2.361131 | 4 |
| 10              | 2.206811 | 0.6354272 | 4 | 9.921396 | 3.480271 | 4 |
| 20              | 2.292276 | 0.64626   | 4 | 10.83645 | 2.318764 | 4 |
| 30              | 2.184406 | 0.6165758 | 4 | 15.33042 | 3.71372  | 4 |
| 0 LPS           | 9.533554 | 1.699914  | 4 | 15.67188 | 2.968246 | 4 |
| 10 LPS          | 8.394997 | 1.808815  | 4 | 14.92238 | 3.265774 | 4 |
| 20 LPS          | 7.854643 | 0.7053187 | 4 | 16.0126  | 4.157615 | 4 |
| 30 LPS          | 8.011962 | 0.9322535 | 4 | 9.236403 | 3.619916 | 4 |
| 0 TNF- $\alpha$ | 8.485684 | 3.393147  | 4 | 14.34096 | 3.408254 | 4 |

### Submerged basal

|                 | 4h        |          |   | 24h      |          |   |
|-----------------|-----------|----------|---|----------|----------|---|
|                 | Mean      | SEM      | N | Mean     | SEM      | N |
| 0               | 0.9961734 | 0.177912 | 4 | 6.458008 | 2.182904 | 4 |
| 10              | 1.54031   | 0.499004 | 4 | 13.97257 | 4.130198 | 4 |
| 20              | 2.284887  | 1.161869 | 4 | 14.37367 | 1.105503 | 4 |
| 30              | 2.453401  | 1.232491 | 4 | 12.04253 | 2.516031 | 4 |
| 0 LPS           | 9.793168  | 3.755139 | 4 | 27.15633 | 3.423011 | 4 |
| 10 LPS          | 7.492945  | 2.962165 | 4 | 28.11841 | 4.925918 | 4 |
| 20 LPS          | 8.738611  | 3.699433 | 4 | 26.72217 | 4.865003 | 4 |
| 30 LPS          | 9.399978  | 3.434271 | 4 | 27.9281  | 4.984178 | 4 |
| 0 TNF- $\alpha$ | 5.886376  | 1.835631 | 4 | 28.6316  | 6.301556 | 4 |

**Figure S5:** IL-8 ELISA numerical values (Figure 5).

## Air-liquid

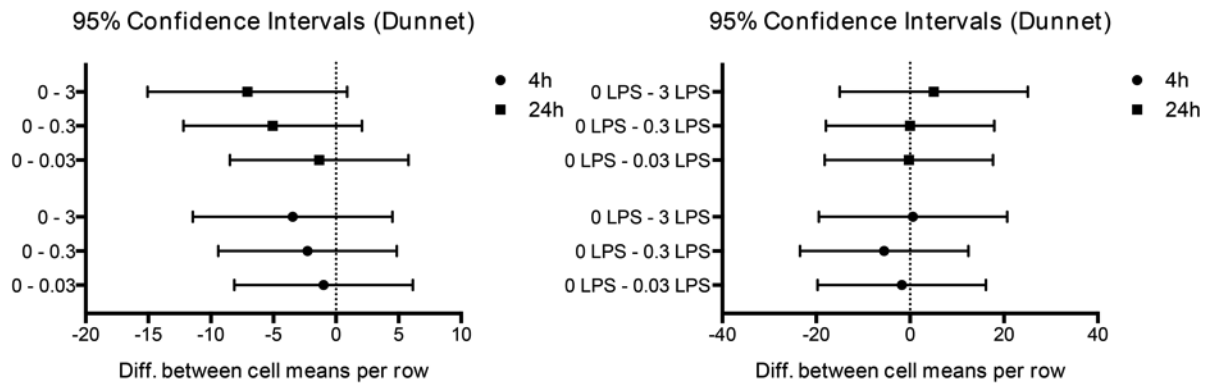

## Submerged apical

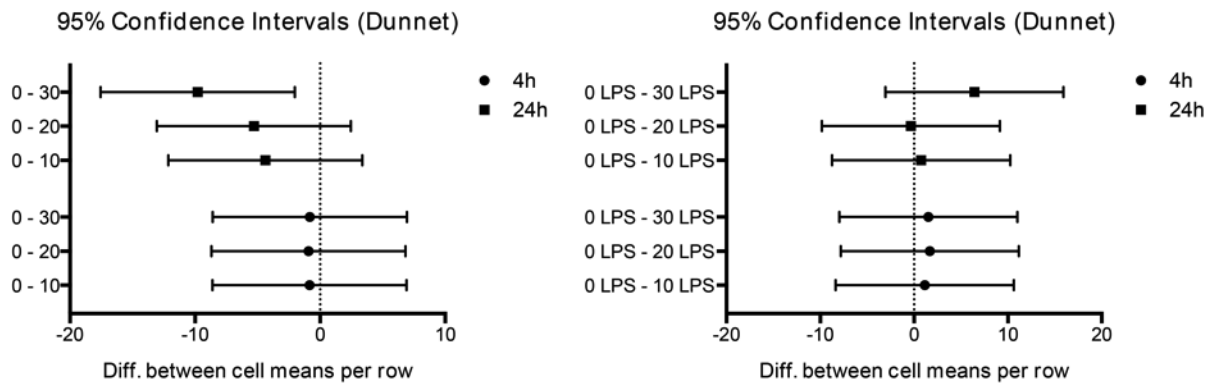

## Submerged basal

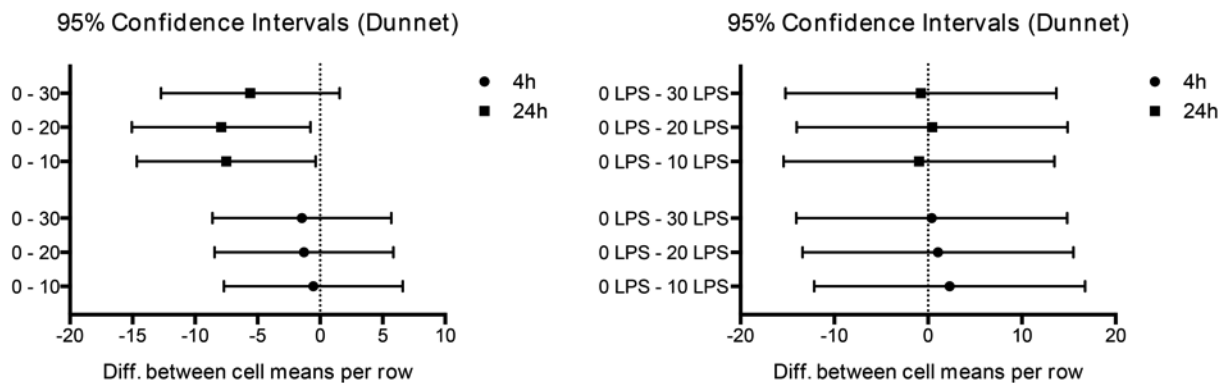

**Figure S6:** IL-8 ELISA confidence intervals (Figure 5).

## Real-time RT-PCR statistical information

### Air-liquid 4h

|               | TNF- $\alpha$ |           |   | IL-8     |           |   | HMOX-1    |            |   | SOD-1     |           |   |
|---------------|---------------|-----------|---|----------|-----------|---|-----------|------------|---|-----------|-----------|---|
|               | Mean          | SEM       | N | Mean     | SEM       | N | Mean      | SEM        | N | Mean      | SEM       | N |
| 0.03          | 3.380989      | 0.9192738 | 4 | 2.629355 | 0.6822194 | 4 | 1.214474  | 0.4239489  | 4 | 1.994697  | 1.294724  | 4 |
| 0.3           | 13.68572      | 6.859244  | 4 | 21.08179 | 9.979162  | 4 | 3.936073  | 2.877128   | 4 | 1.635696  | 0.8887775 | 4 |
| 0 LPS         | 13.02216      | 7.596604  | 4 | 40.54984 | 19.25233  | 4 | 1.225706  | 0.4650098  | 4 | 1.419569  | 0.1964079 | 4 |
| 0.03 LPS      | 13.04659      | 2.942452  | 4 | 49.07214 | 26.51158  | 4 | 0.4917439 | 0.08347811 | 4 | 1.460708  | 0.8934079 | 4 |
| 0.3 LPS       | 13.87112      | 4.837963  | 4 | 50.90971 | 17.9249   | 4 | 0.5910786 | 0.1238672  | 4 | 0.6180258 | 0.2575335 | 4 |
| TNF- $\alpha$ | 17.2677       | 15.89096  | 3 | 14.58669 | 8.748199  | 3 | 0.5660224 | 0.1465191  | 4 | 0.8871207 | 0.2933809 | 4 |

### Air-liquid 24h

|               | TNF- $\alpha$ |           |   | IL-8     |           |   | HMOX-1    |           |   | SOD-1    |           |   |
|---------------|---------------|-----------|---|----------|-----------|---|-----------|-----------|---|----------|-----------|---|
|               | Mean          | SEM       | N | Mean     | SEM       | N | Mean      | SEM       | N | Mean     | SEM       | N |
| 0.03          | 2.382542      | 0.8100402 | 3 | 3.611365 | 3.029494  | 3 | 1.179974  | 0.2965065 | 3 | 1.092582 | 0.2239712 | 3 |
| 0.3           | 3.837958      | 2.211317  | 3 | 0.720722 | 0.5128186 | 3 | 1.464395  | 0.4357439 | 3 | 1.776737 | 0.6121695 | 3 |
| 0 LPS         | 11.34615      | 5.855048  | 4 | 15.6601  | 3.524914  | 4 | 1.009881  | 0.2115368 | 4 | 2.246957 | 0.7774521 | 4 |
| 0.03 LPS      | 6.238909      | 2.579321  | 3 | 15.92512 | 9.566056  | 3 | 1.522587  | 0.3370367 | 3 | 1.258192 | 0.3432497 | 3 |
| 0.3 LPS       | 6.463327      | 4.39348   | 4 | 19.29043 | 6.630352  | 3 | 0.8893991 | 0.2740776 | 4 | 1.049743 | 0.2276793 | 4 |
| TNF- $\alpha$ | 3.274363      | 1.316628  | 3 | 31.00285 | 28.28897  | 3 | 1.175377  | 0.2232322 | 4 | 1.83737  | 0.5806355 | 4 |

**Figure S7:** Real-time RT-PCR numerical values (Figure 6).



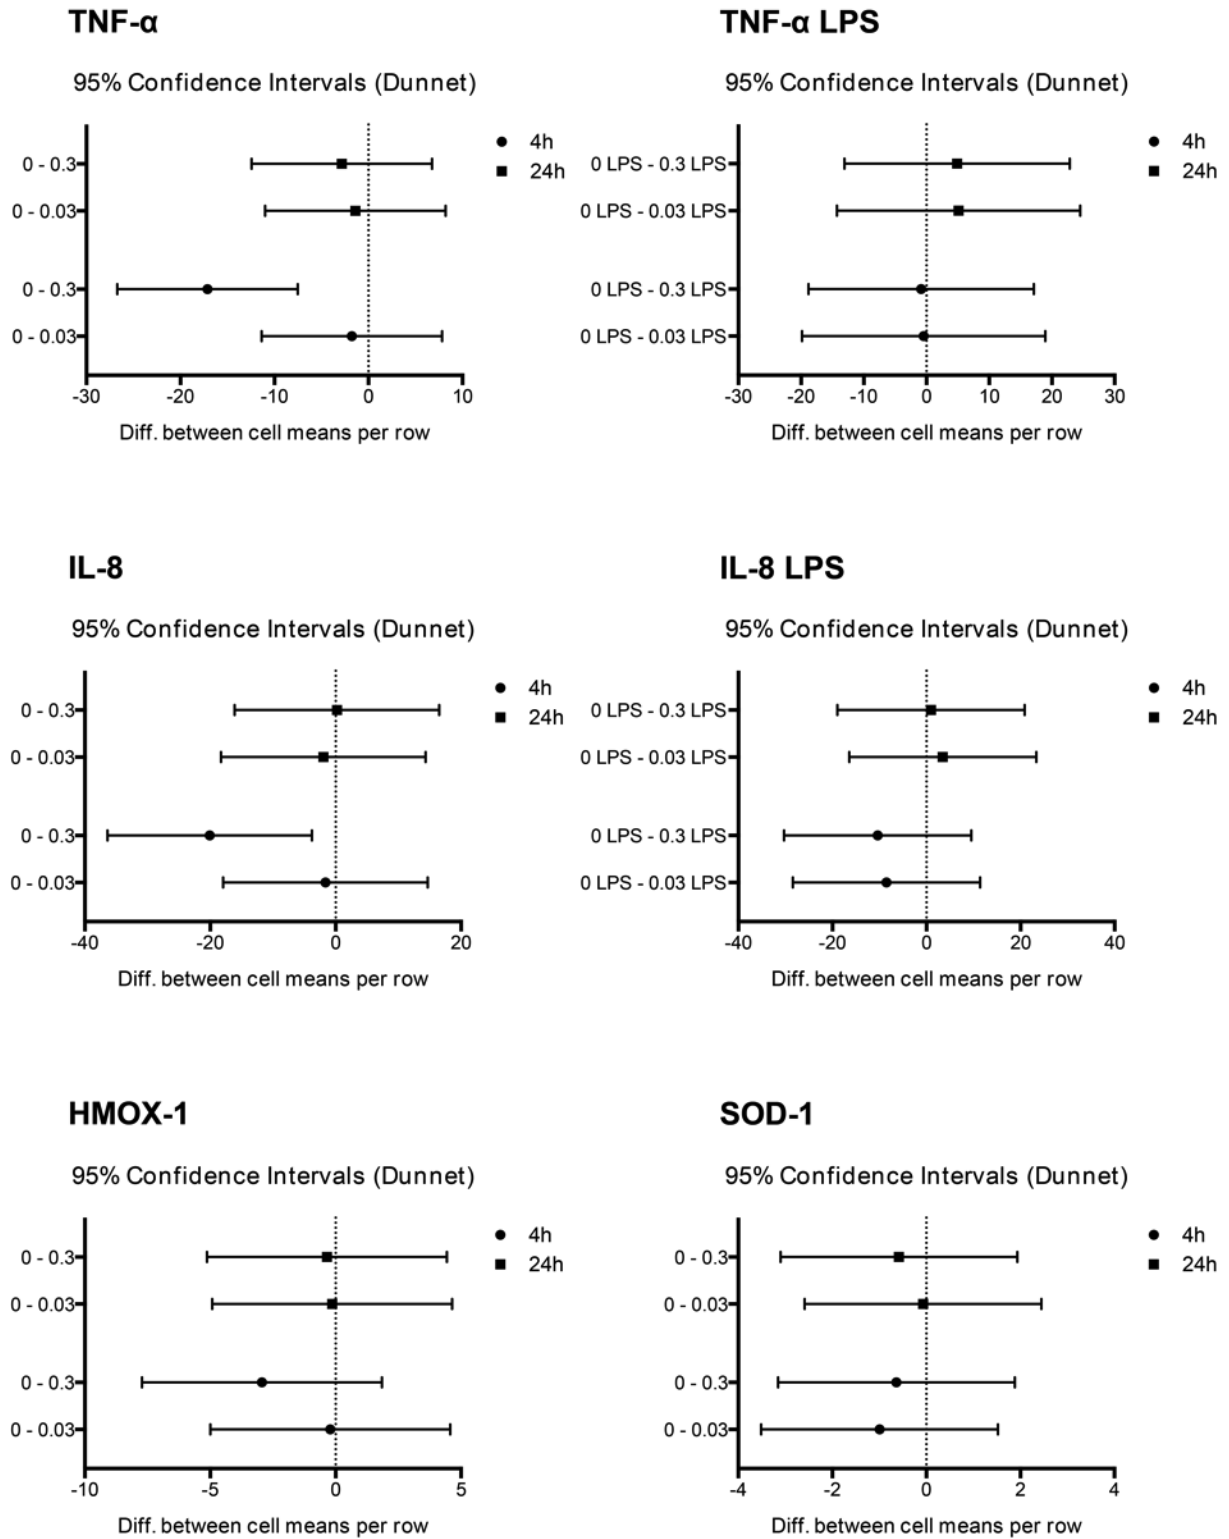

**Figure S8:** Real-time RT-PCR confidence intervals (Figure 6).
